# Supplementary material
Source: PubMed Central journal article supplement (PMC6893999)
Supplement: UEG874176_Supplemental_material.pdf [file UEG874176_Supplemental_material.pdf]

## Supplemental material

**Table A1 -Variables, labels and codes in our dataset.**

| Name                                      | Label                        | Codes                                                                                                                                             |
|-------------------------------------------|------------------------------|---------------------------------------------------------------------------------------------------------------------------------------------------|
| Patient Age                               | Age                          |                                                                                                                                                   |
| Patient Gender                            | Gender                       | female - male                                                                                                                                     |
| Indication for colonoscopy                | Indication                   | screening - symptoms - surveillance                                                                                                               |
| Inpatient setting                         | inpatient                    | inpatient - outpatient                                                                                                                            |
| Practice setting                          | practice                     | academic - general hospital                                                                                                                       |
| Antithrombotic Therapy                    | Therapy                      | yes - no                                                                                                                                          |
| Endoscopic shape of polyps                | Morphology                   | Pedunculated (either pedunculated or semi-pedunculated) - Sessile - LST (either granular or non-granular lesions)                                 |
| The size of polyp                         | Diameter                     |                                                                                                                                                   |
| Polyp location in the large intestine     | Colon location               | Distal colon (Splenic Flexure, Descending, Sigmoid Colon, and Rectum) - Proximal colon ((Cecum, Ascending, Hepatic Flexure, and Transverse Colon) |
| Endoscopic removal of polyp               | Polyp Removed                | yes - no (referred for surgical removal or referred to specialized colonoscopy centers)                                                           |
| The removal modality                      | Modality                     | standard polypectomy; EMR or UEMR; ESD                                                                                                            |
| The resection technique                   | Technique                    | en bloc - piecemeal                                                                                                                               |
| Tattooing practice                        | tattooing                    | yes - no                                                                                                                                          |
| Bleeding prophylaxis prior to colonoscopy | Pre-colonoscopy Prophylaxis  | yes - no                                                                                                                                          |
| Bleeding prophylaxis after colonoscopy    | Post-colonoscopy Prophylaxis | yes - no                                                                                                                                          |
| Histology of polyp                        | Histology                    | CRC infiltrating - adenocarcinoma - tubular adenoma - tubulovillous or villous adenoma - SSA - hyperplastic or                                    |

|                                    |                     |                                                               |
|------------------------------------|---------------------|---------------------------------------------------------------|
|                                    |                     | benign lesions                                                |
| Grade of dysplasia                 | Dysplasia           | high grade - low grade                                        |
| Indications after a resected polyp | Management of polyp | surgery - surveillance<br>colonoscopy - repeat<br>colonoscopy |

### Correlation Coefficient (Multicollinearity)

**Intra-Procedural Bleeding** - We examined the correlations between the variables (predictors) in our data set. The goal was to identify those variables which have a strong association. For the purpose of this analysis, categorical variables with n levels were transformed into n-1 dummy variables. The correlation coefficients for all pairs of the study predictors were calculated using Pearson's measurements, with the values ranging from -1 (negative correlation) to 1 (positive correlation). As a general rule, correlation coefficients (in absolute value) between 0.3 and 0.5 indicate variables that have a low correlation. Correlation coefficients less than 0.3 have little if any correlation. Values between 0.7-0.8 indicate moderate correlations, while values of 0.9 or greater indicate strong correlations. Correlation coefficients between predictor variables of  $|r| > 0.7$  is an appropriate indicator for when collinearity begins to severely distort model estimation and subsequent prediction. In our datasets all correlation coefficients were  $< 0.3$  (see Figure A1/A2), indicating little correlation.

**Figure A1 - Correlation Coefficients between predictors of intra-procedural bleeding for pedunculated polyps.** Correlation coefficients less than 0.3 have little if any correlation. Values between 0.3 and 0.5 indicate variables that have a low correlation. Correlation coefficients between predictor variables of  $|r| > 0.7$  is an appropriate indicator for when collinearity begins to severely distort model estimation and subsequent prediction.

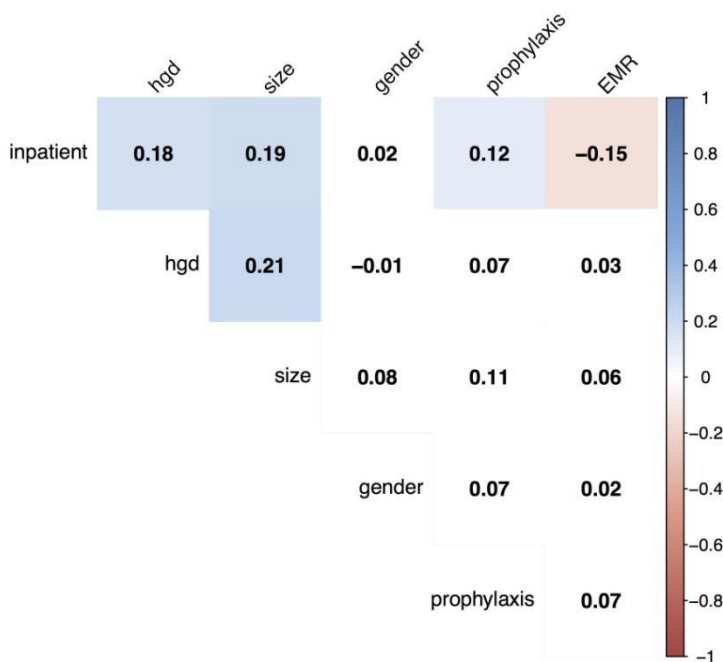

**Figure A2 - Correlation Coefficients between predictors of intra-procedural bleeding for non-pedunculated polyps.** Correlation coefficients less than 0.3 have little if any correlation. Values between 0.3 and 0.5 indicate variables that have a low correlation. Correlation coefficients between predictor variables of  $|r| > 0.7$  is an appropriate indicator for when collinearity begins to severely distort model estimation and subsequent prediction.

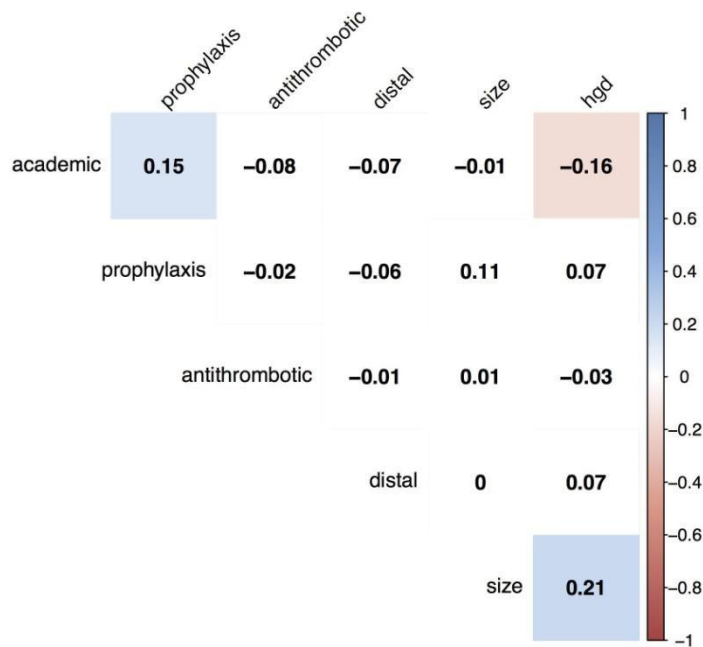

**Variance Inflation Factor (Multicollinearity)**

Multicollinearity refers to a situation in which an explanatory variable within a regression model is correlated with other predictors. The primary test for detecting multicollinearity in a set of predictors is the variance inflation factor (VIF) test. It determines how much of the inflation in the standard error could be caused by collinearity. Variance inflation factors are calculated for each predictor in the regression model. While there is disagreement on the appropriate cutoff for identifying whether the model suffers from multicollinearity, the following rules provide a rough guideline.

1. If  $VIF > 1$  and  $VIF < 2.5$ , (conservative levels) then those explanatory variables are moderately correlated.
2. If  $VIF > 2.5$ , then those variables are highly correlated.

In our analyses, there was no multicollinearity: all variables have a value of VIF well below 2 (Table A1).

**Table A2 - Multivariable analysis for intra-procedural bleeding. Multicollinearity - VIF, variance inflation factor**

|                                                 | <b>Pedunculated Lesions</b> | <b>Non-Pedunculated Lesions</b> |
|-------------------------------------------------|-----------------------------|---------------------------------|
| <b>Variable</b>                                 | <b>VIF</b>                  | <b>VIF</b>                      |
| Inpatient setting                               | 1.15                        | NR                              |
| Pre-endoscopy prophylaxis                       | 1.15                        | 1.10                            |
| Polyp size                                      | 1.10                        | 1.10                            |
| Polyp resection (simple polypectomy vs. EMR)    | 1.10                        | NE                              |
| Practice center (academic vs. general hospital) | NE                          | 1.05                            |
| Polyp Dysplasia                                 | 1.06                        | 1.09                            |
| Colon location (distal vs. proximal)            | NE                          | 1.03                            |
| Antithrombotic Therapy                          | NE                          | 1.00                            |

**Table A3 - Univariable multinomial regression models explaining patients with delayed bleeding versus patients with immediate bleeding versus non-bleeding patients.**

|                                          | <b>none vs. delayed Bleeding</b> |         | <b>none vs. delayed Bleeding</b> |         |
|------------------------------------------|----------------------------------|---------|----------------------------------|---------|
|                                          | <b>Univariate Model</b>          |         | <b>Univariate Model</b>          |         |
|                                          | ORs<br>[95% CIs]                 | P-value | ORs<br>[95% CIs]                 | P-value |
| <b>Variable</b>                          |                                  |         |                                  |         |
| <b>Age as continuous</b>                 | 0.97 (0.94-1.01)                 | 0.184   | 0.97 (0.94-1.00)                 | 0.088   |
| <b>Gender</b>                            |                                  |         |                                  |         |
| Female                                   | 1                                |         | 1                                |         |
| Male                                     | 0.77 (0.33-1.81)                 | 0.554   | 0.86 (0.40-1.95)                 | 0.744   |
| <b>Indication for colonoscopy</b>        |                                  |         |                                  |         |
| Diagnostic/surveillance                  | 1                                |         | 1                                |         |
| Screening                                | 2.94 (0.98-8.71)                 | 0.051   | 3.67 (1.40-9.56)                 | 0.008   |
| <b>Polyp size as continuous variable</b> |                                  |         |                                  |         |
| Polyp size                               | 0.97 (0.93-1.00)                 | 0.082   | 0.96 (0.93-0.99)                 | 0.012   |
| <b>Polyp size</b>                        |                                  |         |                                  |         |
| Giant                                    | 1                                |         | 1                                |         |
| Large                                    | 1.80 (0.77-4.20)                 | 0.176   | 2.44 (1.17-5.09)                 | 0.017   |
| <b>Polyp Morphology</b>                  |                                  |         |                                  |         |
| LST/sessile                              |                                  |         | 1                                |         |
| Pedunculated                             | NE                               |         | 1.22 (0.54-2.75)                 | 0.631   |
| <b>Colon Location</b>                    |                                  |         |                                  |         |
| Proximal                                 | 1                                |         | 1                                |         |

|                                                            |                   |       |                  |        |
|------------------------------------------------------------|-------------------|-------|------------------|--------|
| Distal                                                     | 1.53 (0.64-8.64)  | 0.337 | 1.48 (0.72-3.03) | 0.270  |
| <b>Dysplasia, n (%)</b>                                    |                   |       |                  |        |
| HGD                                                        | 1                 |       | 1                |        |
| LGD,                                                       | 0.97 (0.42-2.23)  | 0.951 | 1.06 (0.52-2.17) | 0.868  |
| <b>Bleeding prophylaxis before exam</b>                    |                   |       |                  |        |
| No                                                         | 1                 |       | 1                |        |
| Yes                                                        | 1.00 (0.40-2.45)  | 0.995 | 0.89 (0.40-2.10) | 0.781  |
| <b>Anesthesiologist present</b>                            |                   |       |                  |        |
| No                                                         | 1                 |       | 1                |        |
| Yes                                                        | 0.74 (0.31-1.77)  | 0.497 | 0.66 (0.31-1.42) | 0.290  |
| <b>Antithrombotic therapy (either ongoing or withheld)</b> |                   |       |                  |        |
| No                                                         | 1                 |       | 1                |        |
| Yes                                                        | 0.29 (0.13-0.65)  | 0.003 | 0.28 (0.14-0.57) | <0.001 |
| <b>Resection Mode</b>                                      |                   |       |                  |        |
| EMR/ESD                                                    | 1                 |       | 1                |        |
| Simple polypectomy                                         | 1.89 (0.37-9.58)  | 0.442 | 1.92 (0.78-4.71) | 0.155  |
| <b>Practice Setting</b>                                    |                   |       |                  |        |
| General Hospital                                           | 1                 |       | 1                |        |
| Academic Hospital                                          | 3.31 (0.27-14.24) | 0.107 | 1.49 (0.57-3.92) | 0.197  |
| <b>Endoscopy Setting</b>                                   |                   |       |                  |        |
| Outpatient                                                 | 1                 |       | 1                |        |
| Inpatient                                                  | 1.11 (0.48-2.59)  | 0.805 | 1.00 (0.47-2.11) | 0.417  |
